# Supplementary material for: Topical application of calcitonin gene-related peptide as a regenerative, antifibrotic, and immunomodulatory therapy for corneal injury
Source: PubMed Central journal article supplement (PMC10912681; doi:10.1038/s42003-024-05934-y), 2024-03-04
Supplement: 42003_2024_5934_MOESM2_ESM.pdf [file 42003_2024_5934_MOESM2_ESM.pdf]

**Title:** Topical application of calcitonin gene-related peptide as a regenerative, antifibrotic, and immunomodulatory therapy for corneal injury

**Authors:** Asmaa A. Zidan<sup>1</sup>, Shuyan Zhu<sup>1</sup>, Elsayed Elbasiony<sup>1</sup>, Sheyda Najafi<sup>1</sup>, Zhirong Lin<sup>1</sup>, Rohan Bir Singh<sup>1</sup>, Amirreza Naderi<sup>1</sup>, Jia Yin<sup>1\*</sup>.

**Affiliation:** 1- Schepens Eye Research Institute of Massachusetts Eye and Ear, Department of Ophthalmology, Harvard Medical School, Boston, MA, 02114

**\*Corresponding Author**

Jia Yin, MD, PhD, MPH, Schepens Eye Research Institute of Massachusetts Eye and Ear, Department of Ophthalmology, Harvard Medical School, 20 Staniford St., Boston MA 02114.

Email: [jia\\_yin@meei.harvard.edu](mailto:jia_yin@meei.harvard.edu) ; Phone no: +1-617-912-0272

**Keywords:** Corneal wound healing; corneal injury; corneal opacity; ocular trauma; CGRP, calcitonin gene-related peptide

**Supplementary Figure 1. CGRP preserved normal corneal endothelial cell (CEnC) morphology.**

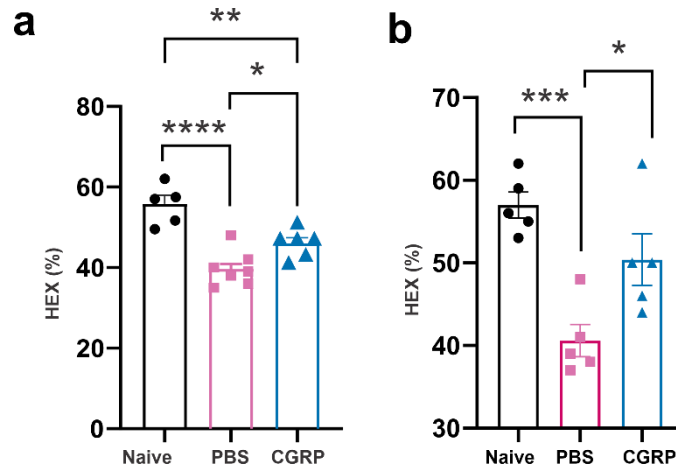

**a** CEnC pleomorphism, or the percentage of normal hexagonal shaped cells over total cells (HEX %), was analyzed using in vivo confocal microscopy images of corneal endothelial cells. While pleomorphism in the injured PBS treated corneas was increased, CGRP treatment preserved the normal morphology. **b** CEnC pleomorphism was analyzed using images of corneal endothelium whole mount stained by ZO-1. Results were similar to Figure A. N=5 mice per group. The data are presented as mean ± standard error of mean and was determined by one-way ANOVA test with pairwise comparison. \*p<0.05, \*\*\*p<0.001, \*\*\*\*p<0.0001.

**Supplementary Figure 2. Short term application of CGRP alleviates corneal opacity but does not impact thickness.**

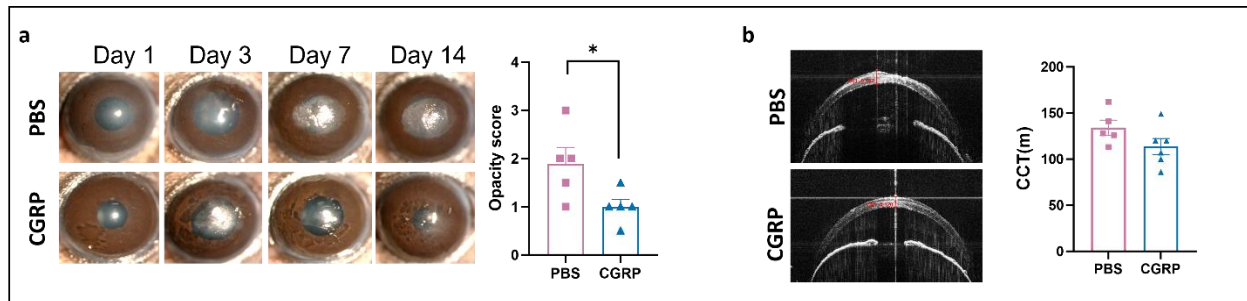

**a** Representative slit lamp photographs of PBS and CGRP-treated eyes up to 5 days after injury. The corneas of the PBS-treated controls showed progressive stromal opacification, whereas CGRP treatment showed significantly lower corneal opacity. **b.** Representative AS-OCT images and analysis showed significant increase in central corneal thickness (CCT) and stromal hyperreflectivity in PBS-treated mice, whereas they were comparable to CGRP treated group on days 14 post-injury. (n=5 per group). The data are represented as mean±SEM. The statistical significance was determined by unpaired t-test, \* p<0.05.

### Supplementary Figure 3. Expression of CGRP receptors by corneal cells.

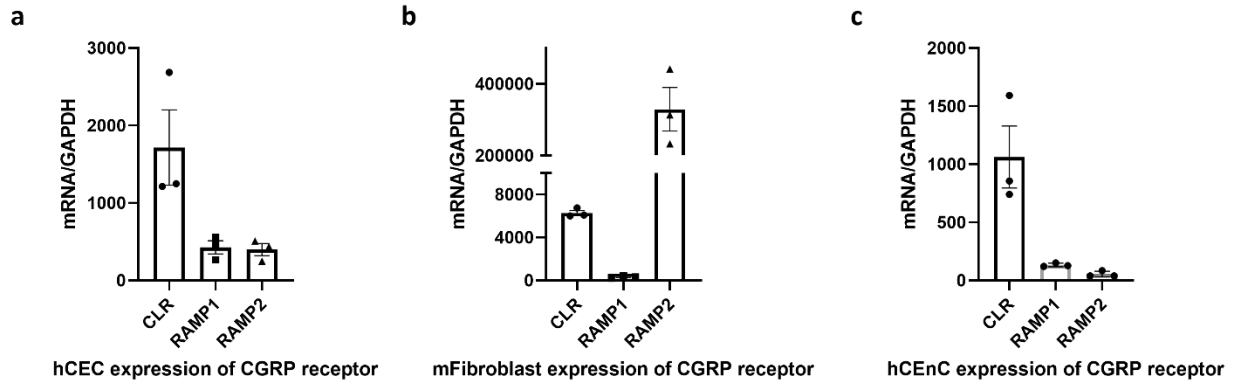

The RT-PCR analysis shows that corneal epithelial cells (hCEC, **a**), corneal fibroblast (**b**) and corneal endothelial cells (**c**) express the CGRP receptors components CLR, RAMP1 and RAMP2.

**Supplementary Figure 4. Analysis of western blot on TGF- $\beta$ 1 expression in vivo and  $\alpha$ SMA expression in vivo and in vitro.**

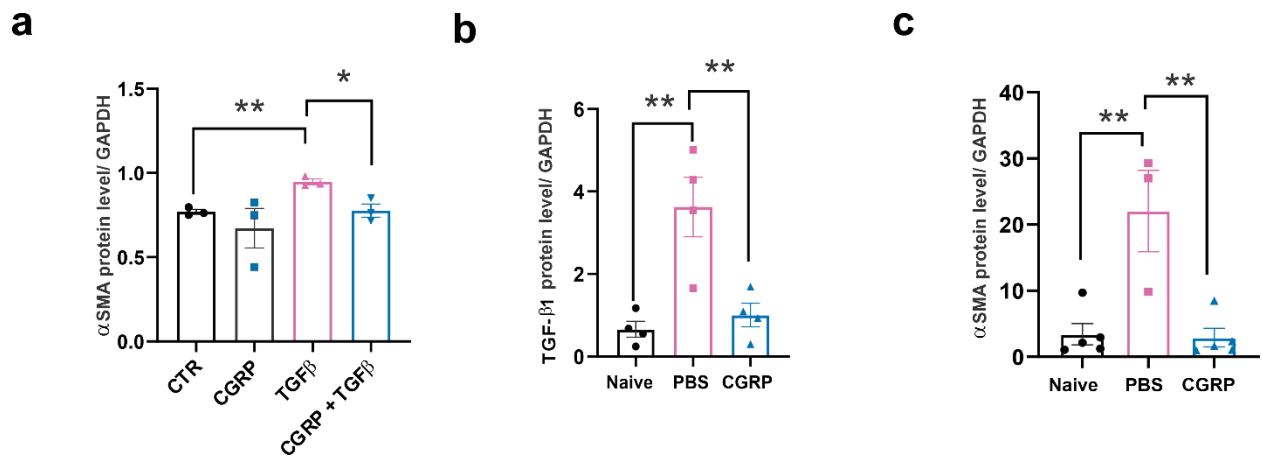

**a** CGRP significantly suppressed TGF- $\beta$ 1-induced  $\alpha$ SMA expression in vitro. **b** CGRP significantly decreased TGF- $\beta$ 1 expression in corneal tissues on day 5 after injury compared to the PBS control. **c** CGRP significantly decreased  $\alpha$ SMA expression in corneal tissues on day 5 after injury compared to the PBS control. n=4 per group. The data are presented as mean  $\pm$  SEM and was determined by one-way ANOVA test with pairwise comparison. \*p<0.05, \*\*p<0.01.

**Supplementary Figure 5. CGRP topical application failed to increase the CGRP concentration in the Aqueous humor.**

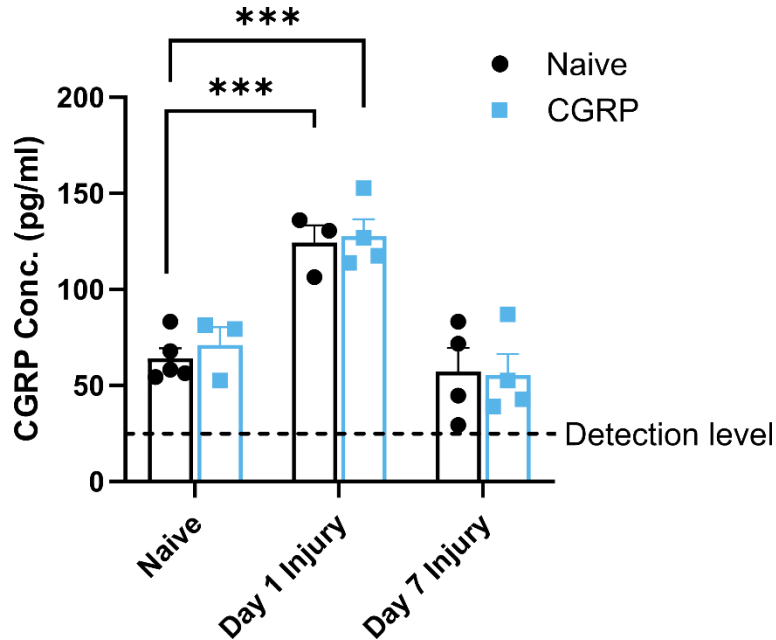

Aqueous humor was collected from naïve, one day and seven days post-injury mice and CGRP concentration was determined using CGRP ELISA Kit. Surprisingly, we noticed a significant increase in CGRP conc. On day 1 post-injury compared to naïve mice. By day 7- post injury, the CGRP concentration was back to normal. Then, CGRP was applied topically for 30 minutes before aqueous humor collection in either naïve mice, or injured mice on day 1 or day 7. No significant difference in the AH concentration was noticed in response to the CGRP application. (Two eyes were pooled together to generate enough volume/sample, n=4/group). The data are represented as mean±SEM. The statistical significance was determined by unpaired t-test,  $p < 0.001$ .

**Supplementary Figure 6. CGRP topical application suppresses ocular hyperalgesia (eye-wiping test) on day 3 post-injury.**

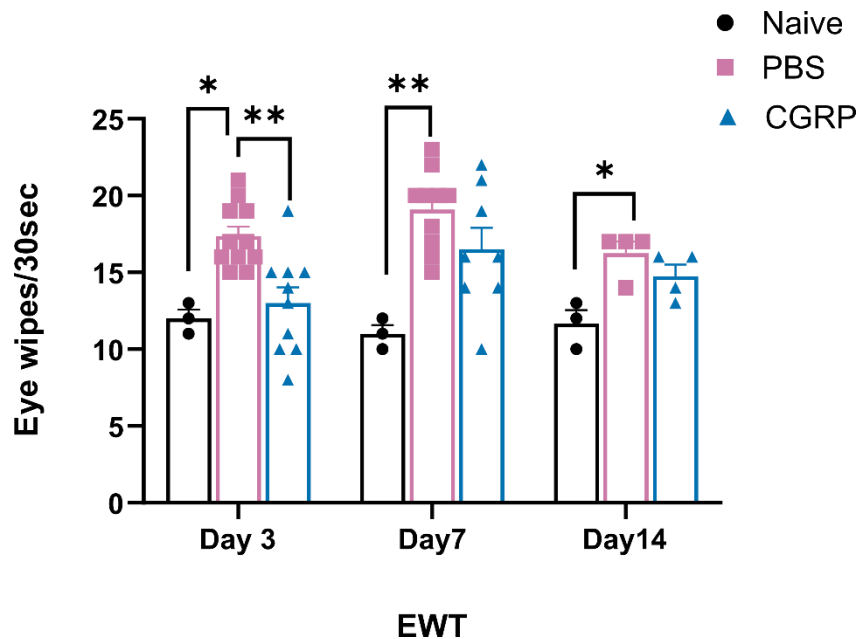

Ocular hyperalgesia was assessed using the eye-wiping test<sup>1,2</sup>. Briefly, a single drop of 2M NaCl was instilled into the animal's eye, and the count of eye wipes with the ipsilateral forelimb was recorded over a 30-second period.

Mechanical injury induced increased eye wipes number up to day 14. CGRP topical administration significantly suppressed the eye wipes on day 3 post-injury. The data are presented as mean  $\pm$ SEM and was determined by one-way ANOVA test with pairwise comparison, \* $p < 0.05$ , \*\* $p < 0.01$ .

**Supplementary Figure 7. The flow cytometry gating strategy.**

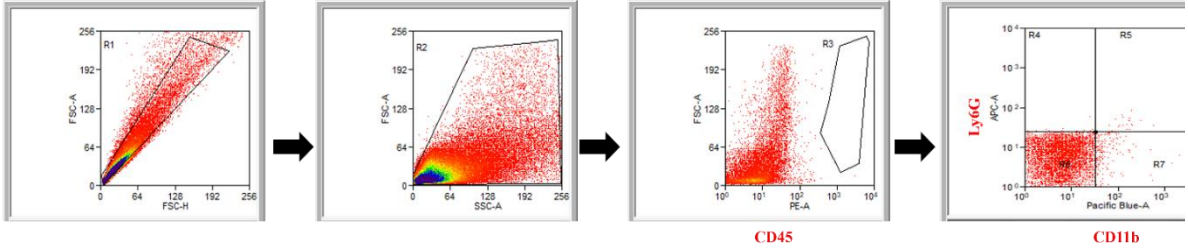

The figure illustrates the gating strategy utilized for identifying inflammatory cells (CD45+) within the cornea, as well as distinguishing the subpopulations of neutrophils (CD11b+Ly6G+) and macrophages (CD11b+Ly6G-).



Supplementary Figure 8. Uncropped blot images.

Fig. 4g

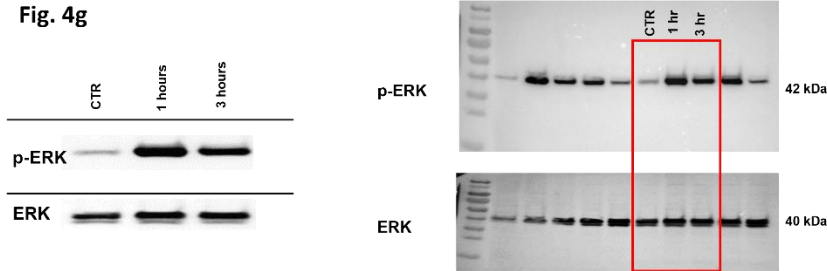

Fig. 5b

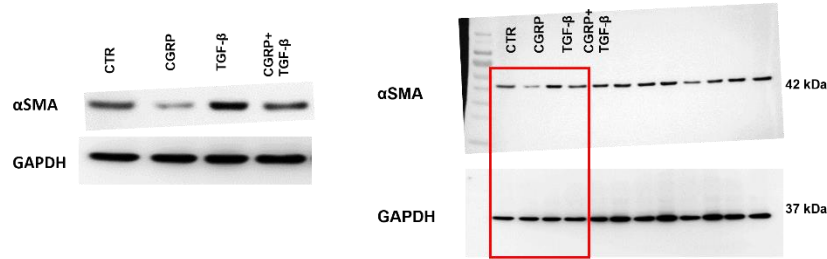

Fig. 5e

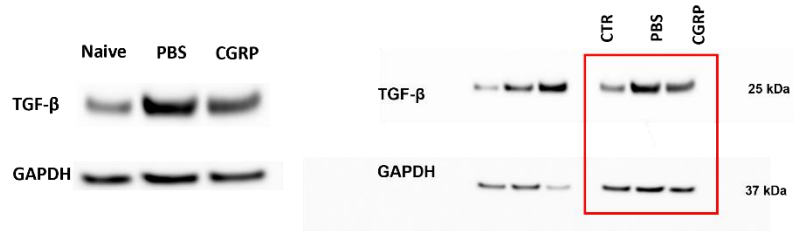

Fig. 5h

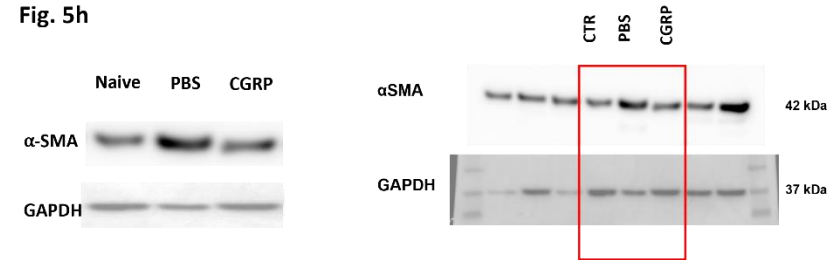

**Supplementary Table 1: The primers used in the RT-qPCR analysis.**

| <b>Name</b>            | <b>Gene name</b> | <b>Primer</b> |
|------------------------|------------------|---------------|
| GAPDH                  | <i>GAPDH</i>     | Mm99999915_g1 |
| CLR                    | <i>Calcr</i>     | Mm00432282_m1 |
| RAMP1                  | <i>RAMP1</i>     | Mm00489796_m1 |
| RAMP2                  | <i>RAMP2</i>     | Mm00490256_g1 |
| Laminin                | <i>LAMA3</i>     | Hs00165042_m1 |
| Alpha SMA              | <i>Acta-2</i>    | Mm00725412_s1 |
| TGF-beta1              | <i>Tgfb1</i>     | Mm01178820_m1 |
| Na/K ATPase $\alpha$ 1 | <i>ATP1A1</i>    | Mm00523255_m1 |
| Na/K ATPase $\alpha$ 3 | <i>ATP1A3</i>    | Mm00523430_m1 |
| Caspase 3 (human)      | <i>CAS3</i>      | Hs00234387_m1 |
| BAX (human)            | <i>BAX</i>       | Hs00180269_m1 |
| GAPDH (human)          | <i>GAPDH</i>     | Hs02786624_g1 |
| CXCL1                  | <i>CXCL1</i>     | Mm00434772_m1 |
| TNF $\alpha$ 1         | <i>TNFA</i>      | Mm00443258_m1 |
| MMP9                   | <i>MMP9</i>      | Mm00442991_m1 |
| IL-1beta               | <i>Il1b</i>      | Mm00434228_m1 |

All the listed Taqman primers were purchased from Thermo-Fischer Scientific Company.

**Supplementary Table 2: The antibodies used in the immunohistochemistry (IHC) and western blot (WB).**

| <b>Antibody</b>                                                                            | <b>Manufacturer</b> | <b>Cat#</b>   |
|--------------------------------------------------------------------------------------------|---------------------|---------------|
| <b>Primary Antibodies (IHC/WB)</b>                                                         |                     |               |
| Ki-67 Monoclonal Antibody (SolA15), FITC,                                                  | Invitrogen          | 11-5698-82    |
| p-ERK Antibody                                                                             | Thermofisher        | 14-9109-82    |
| ERK1/ERK2 Antibody                                                                         | Thermofisher        | 82380         |
| Laminin Antibody                                                                           | Thermofisher        | PA1-16730     |
| Alpha-Smooth Muscle Actin Antibody                                                         | Thermofisher        | 14-9760-82    |
| TGF beta-1 Monoclonal Antibody                                                             | Thermofisher        | MA1-21595     |
| Propidium iodide                                                                           | Sigma-Aldrich       | P4864         |
| Annexin V-FITC                                                                             | Biologend           | 640906        |
| Sodium Potassium ATPase Recombinant Rabbit Monoclonal Antibody (ST0533)                    | Thermofisher        | MA5-32184     |
| Zonula Occludens Antibody                                                                  | Thermofisher        | 33-9100       |
| <b>Secondary Antibodies (IHC)</b>                                                          |                     |               |
| Anti-Mouse IgG1 Nano Recombinant Secondary Antibody, Alexa Fluor™ 488                      | Thermofisher        | SA5-10329     |
| Goat anti-Rabbit IgG Fc, Cross-Adsorbed Secondary Antibody, Alexa Fluor™ 488               | Thermofisher        | A78953        |
| Goat anti-Rabbit IgG (H+L) Highly Cross-Adsorbed Secondary Antibody, Alexa Fluor™ Plus 594 | Thermofisher        | A32740        |
| Goat anti-Mouse IgG (H+L) Cross-Adsorbed Secondary Antibody, Alexa Fluor™ 594              | Thermofisher        | A-11005       |
| <b>Secondary Antibodies (WB)</b>                                                           |                     |               |
| Goat anti-Rabbit IgG (H+L) secondary antibody, HRP                                         | Thermofisher        | 32460         |
| Goat anti-Mouse IgG (H+L) Secondary Antibody, HRP                                          | Thermofisher        | 31430         |
| GADPH loading control antibody-HRP                                                         | Thermofisher        | MA5-15738-HRP |

### Supplementary References:

- 1 Farazifard, R., Safarpour, F., Sheibani, V. & Javan, M. Eye-wiping test: a sensitive animal model for acute trigeminal pain studies. *Brain Res Brain Res Protoc* **16**, 44-49 (2005). <https://doi.org:10.1016/j.brainresprot.2005.10.003>
- 2 Nazeri, M., Zarei, M. R., Pourzare, A. R., Ghahre-Chahi, H. R., Abareghi, F. & Shabani, M. Evidence of Altered Trigeminal Nociception in an Animal Model of Fibromyalgia. *Pain Med* **19**, 328-335 (2018). <https://doi.org:10.1093/pm/pnx114>
