# Supplementary material for: Topical application of calcitonin gene-related peptide as a regenerative, antifibrotic, and immunomodulatory therapy for corneal injury
Source: PubMed Central journal article supplement (PMC10912681; doi:10.1038/s42003-024-05934-y), 2024-03-04
Supplement: 42003_2024_5934_MOESM3_ESM.pdf [file 42003_2024_5934_MOESM3_ESM.pdf]

## Description of Additional Supplementary Files

**File name:** Supplementary Data

**Description:** The source data behind the graphs in the paper.
